# Supplementary material
Source: publisher site journal article supplement (https://www.dovepress.com/article/402920)
Supplement: Supplementary file 1 [file get_supplementary_file.php]

**Supplementary material**

*Questionnaire*

| **Age** |
| --- |
| (Text box) |
| **Gender** |
| Male |
| Female |
| Other |
| Prefer not to say |
| **To what extent do you agree with this statement: 'Use of visual aids greatly enhances the ability to identify clinical signs in OSCE scenarios.'** |
| 1 (Strongly disagree) – 5 (Strongly agree) |
| **To what extent do you agree with this statement: 'I am more likely to ask questions in online teaching.'** |
| 1 (Strongly disagree) – 5 (Strongly agree) |
| **To what extent do you agree with this statement: 'I am more likely to ask questions in face to face teaching.'** |
| 1 (Strongly disagree) – 5 (Strongly agree) |
| **To what extent do you agree that; 'Online webinars offer more convenience and flexibility in OSCE teaching.'** |
| 1 (Strongly disagree) – 5 (Strongly agree) |
| **Would you prefer face to face OSCE teaching?** |
| Yes |
| No |
| **To what extent do you agree with this statement: 'I am more likely to participate in discussions face to face.'** |
| 1 (Strongly disagree) – 5 (Strongly agree) |
| **To what extent do you agree with this statement: 'The use of end of lecture quizzes on webinars assist in consolidation of the key topics taught.'** |
| 1 (Strongly disagree) – 5 (Strongly agree) |
| **To what extent do you agree with this statement: 'Breakout rooms/sessions provide an environment for small group focused learning.'** |
| 1 (Strongly disagree) – 5 (Strongly agree) |
| **To what extent do you agree with this statement: 'The advent of virtual OSCE teaching has enabled the delivery to a wider audience.'** |
| 1 (Strongly disagree) – 5 (Strongly agree) |
| **To what extent do you agree with this statement: 'Virtual teaching has enabled the sharing of different approaches to clinical skills techniques.'** |
| 1 (Strongly disagree) – 5 (Strongly agree) |
| **How would you prefer OSCE teaching Lectures to be delivered?** |
| Face to face lecture |
| Virtual lecture |
| **How likely are you to attend OSCE teaching if it were online?** |
| 1 (Very unlikely) – 5 (Very likely) |
| **Are you worried about any potential factors that may affect you if OSCE teaching were online? (Tick all that may apply)** |
| Body Language |
| Using online applications (e.g. Zoom, MS Teams) |
| Clarity of speech |
| Internet connection |
| Surrounding factors |
| Tutor's confidence in using online technology |
| Other |
| **What time of the day are you most likely to attend OSCE teaching?** |
| 5pm-6pm GMT |
| 6pm-7pm GMT |
| 7pm-8pm GMT |
| **Any additional comments?** |
| (Text Box) |

*Consent statement:*

All data will be stored according to GDPR guidelines. By filling in this form, you are providing consent for use of your data in an anonymised fashion for any future publications.

Taking part is completely voluntary. By filling this questionnaire, you are giving your consent to participate in this study and for use of your anonymised data for future publication. Any responses you provide are anonymous. Participating in this survey indicates that you are consenting to the handling of data in accordance with Article 6(1)(a) General Data Protection Regulation (GDPR) principles in the UK. Data will be held for a period of 5 years for the purposes of comparing trends and analytics according to the Cardiff University Policy. Access to the data is only granted to the main authors. The data will be used for academic publications and will be stored in a password-protected account.
